# Supplementary material
Source: PubMed Central journal article supplement (PMC10258734)

# Supplemental Figure 1

## A. GSEA: Top 30 Upregulated

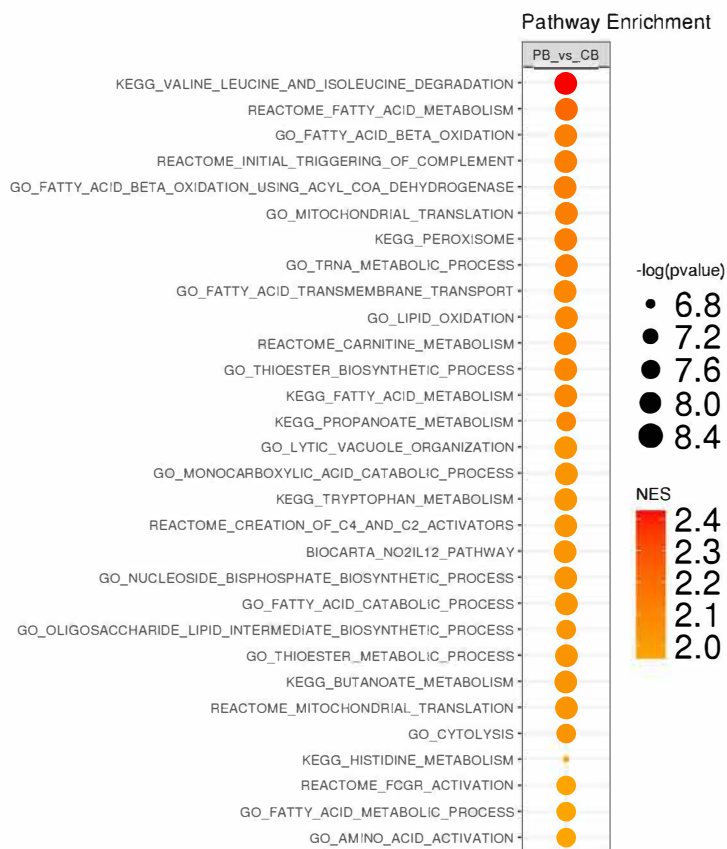

## B. GSEA: Top 30 Downregulated

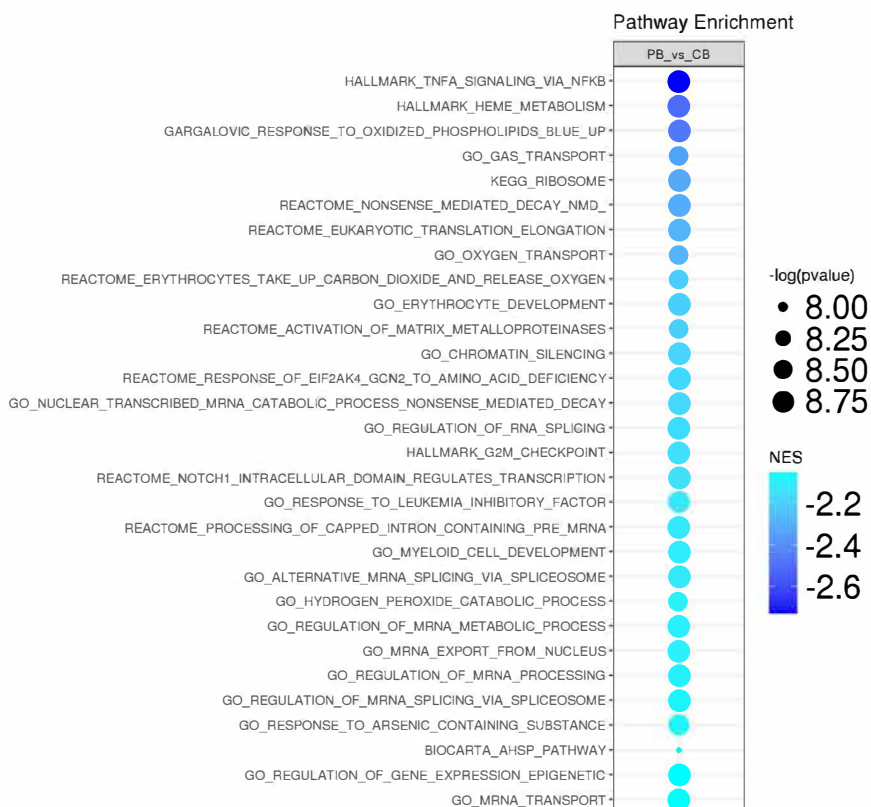

## C.

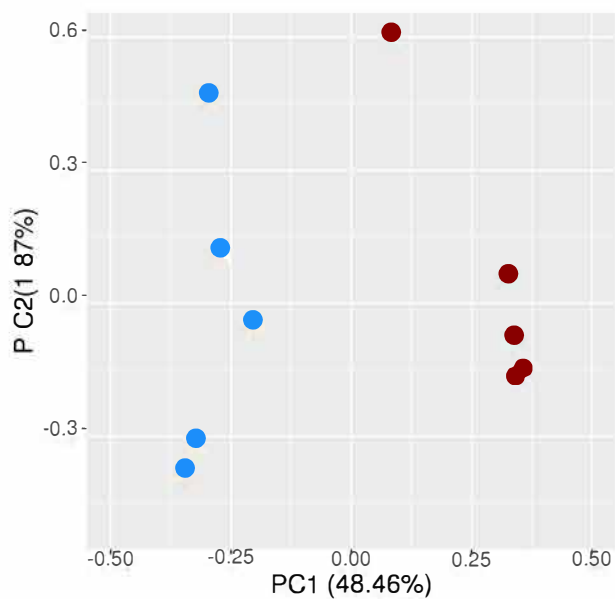

## D.

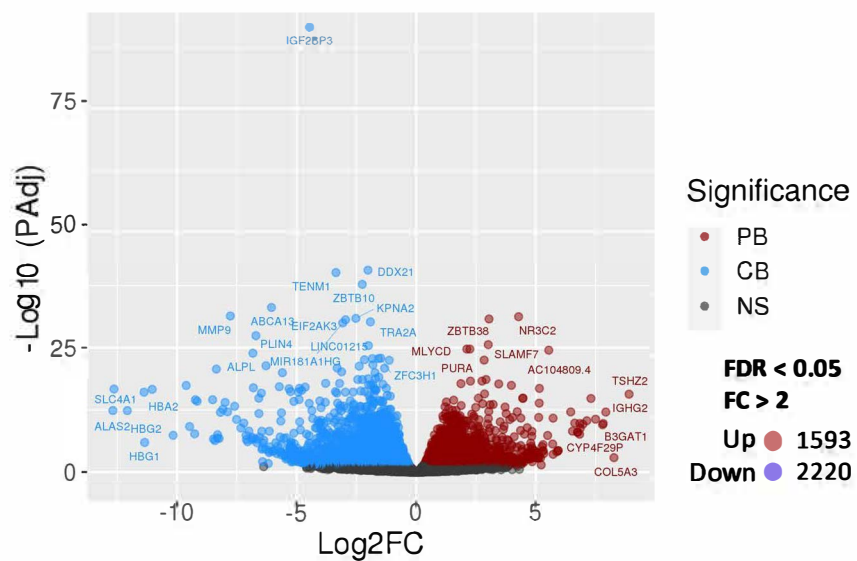



# Supplemental Figure 1

F.

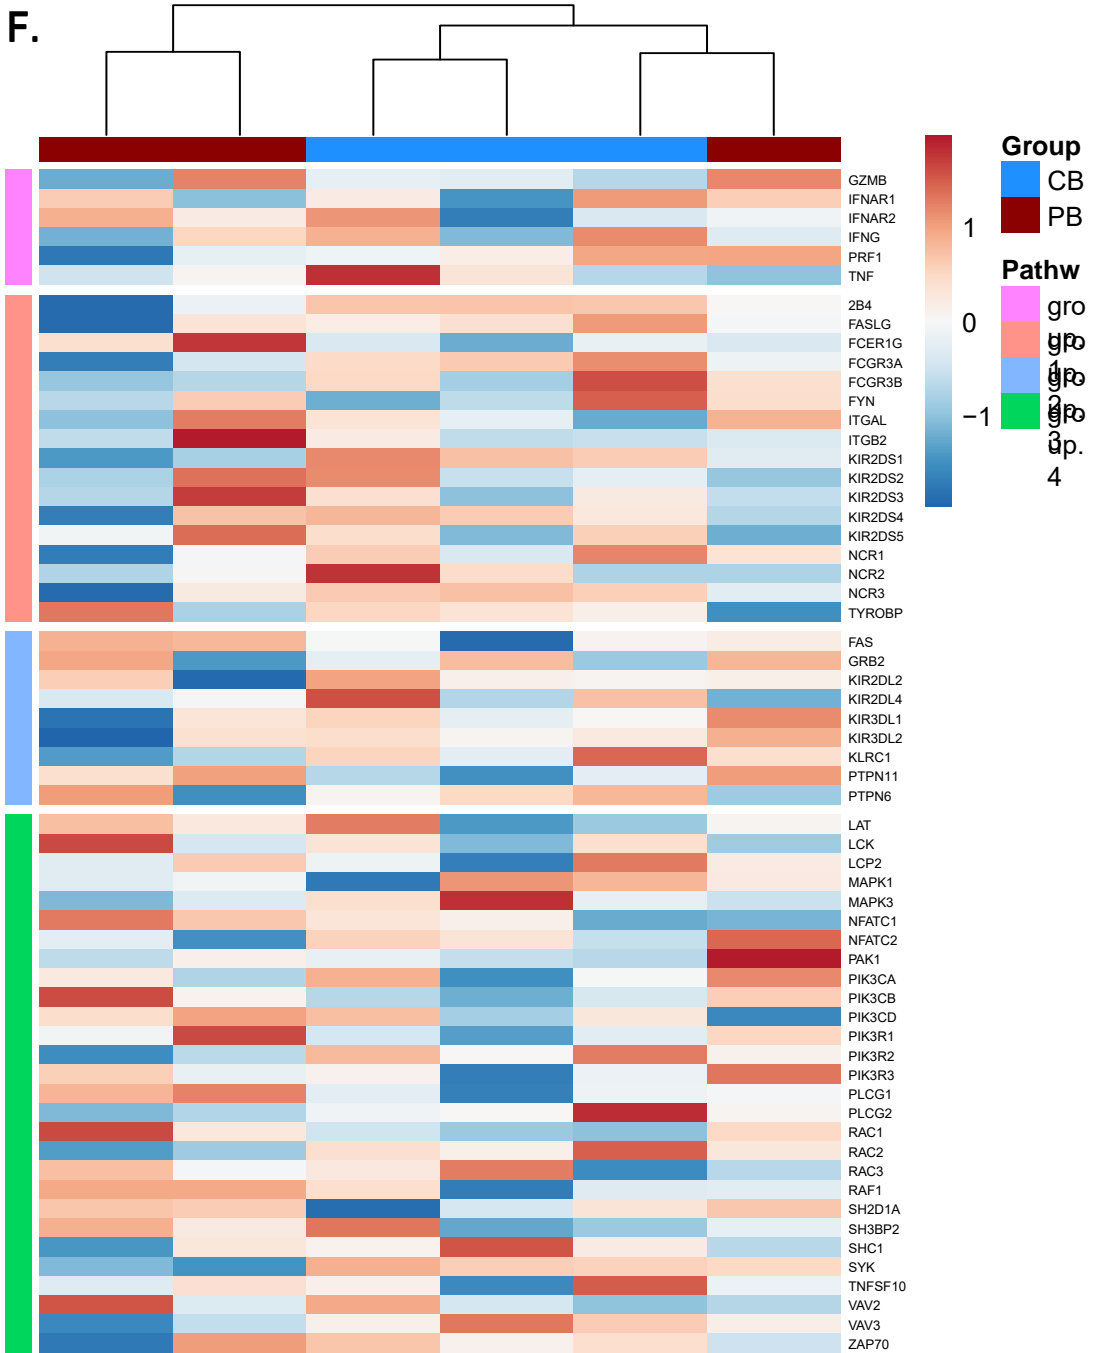

# Supplemental Figure 1

## G.

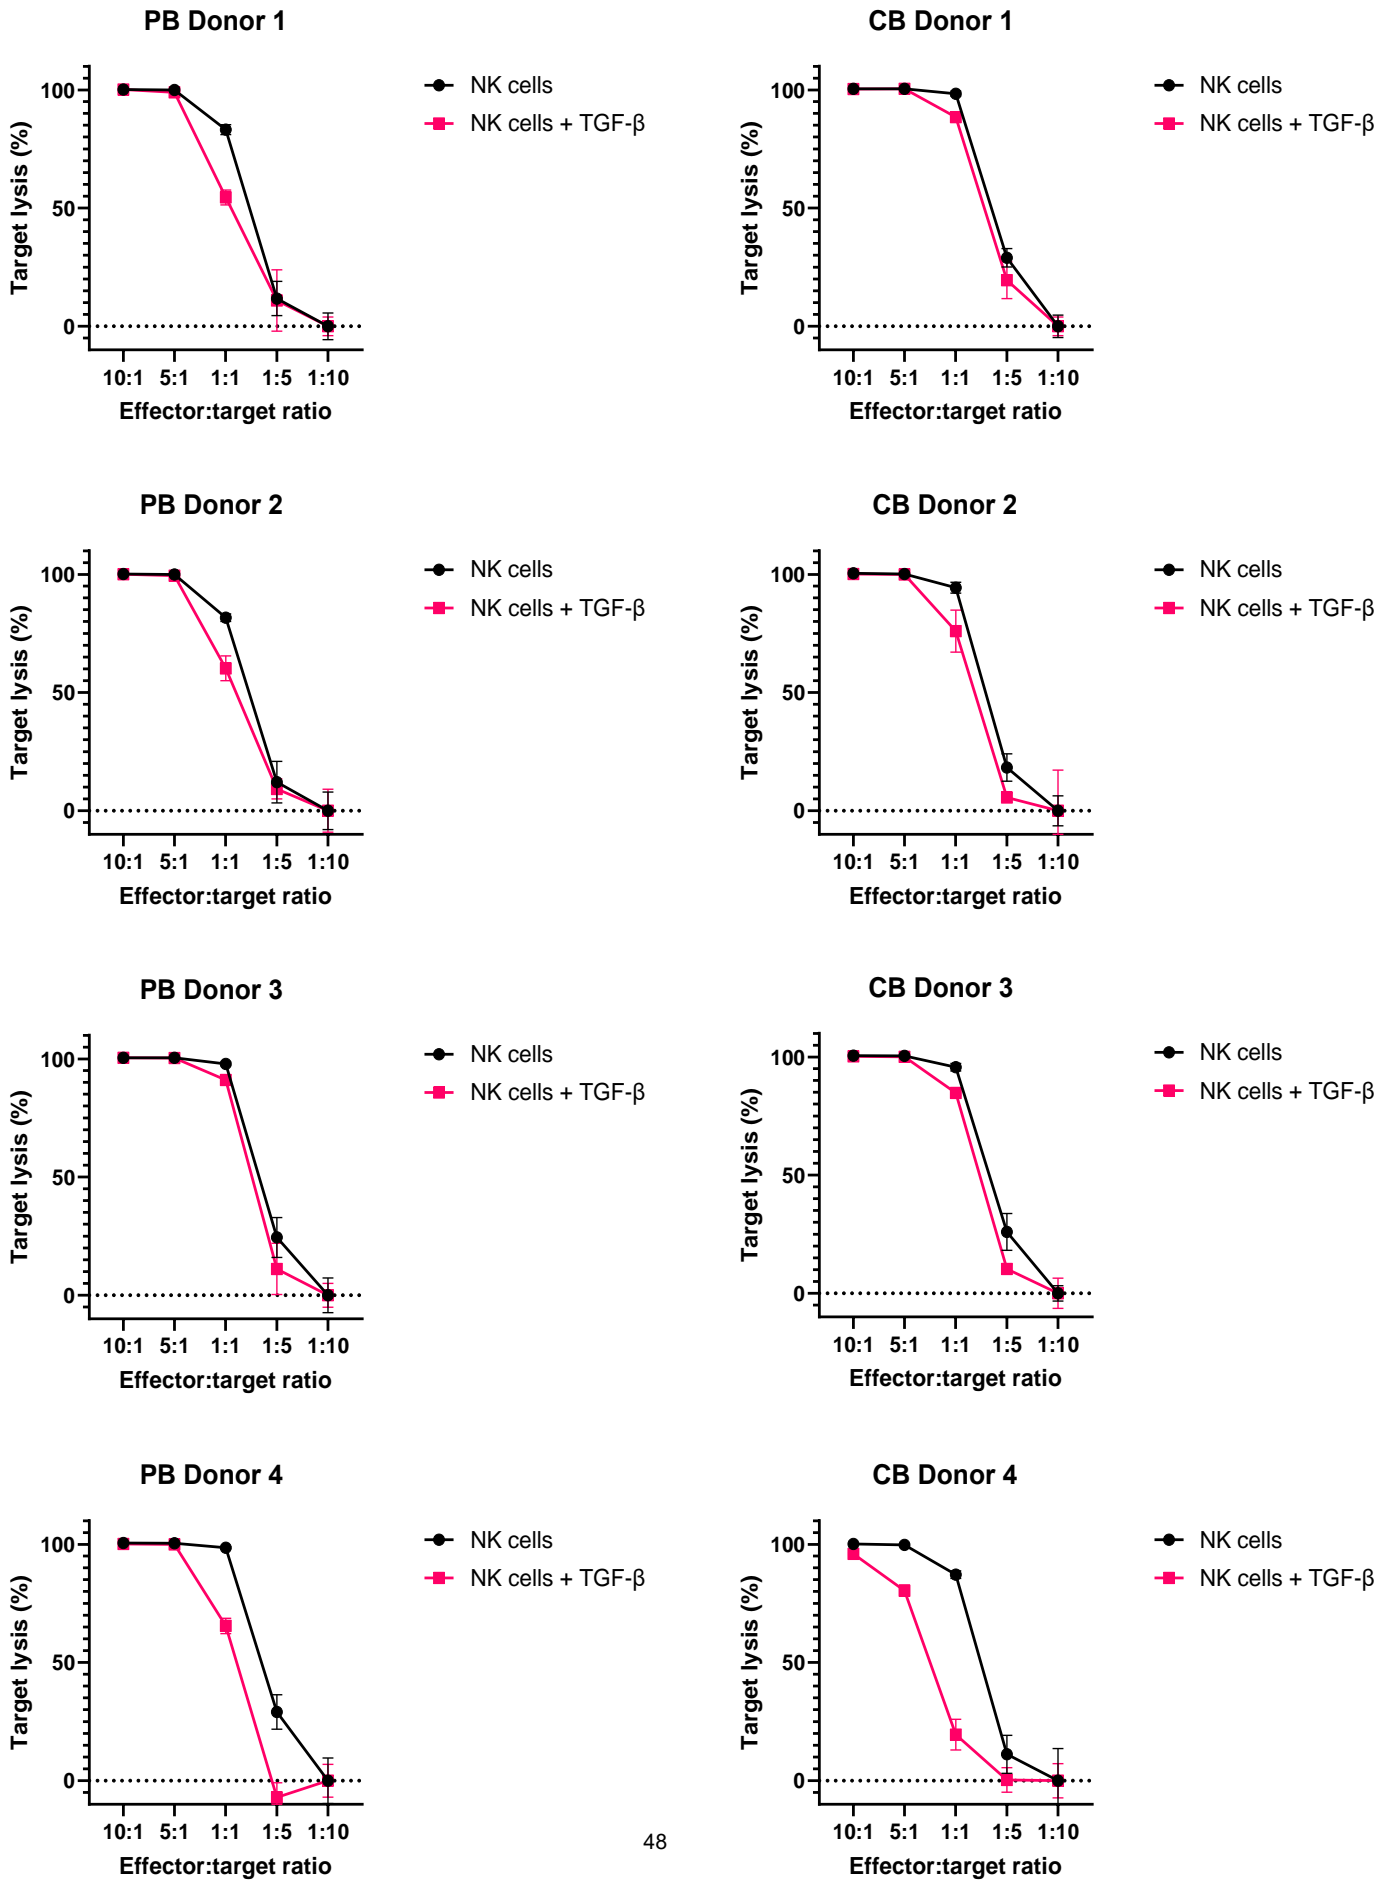

## Supplemental figure 2

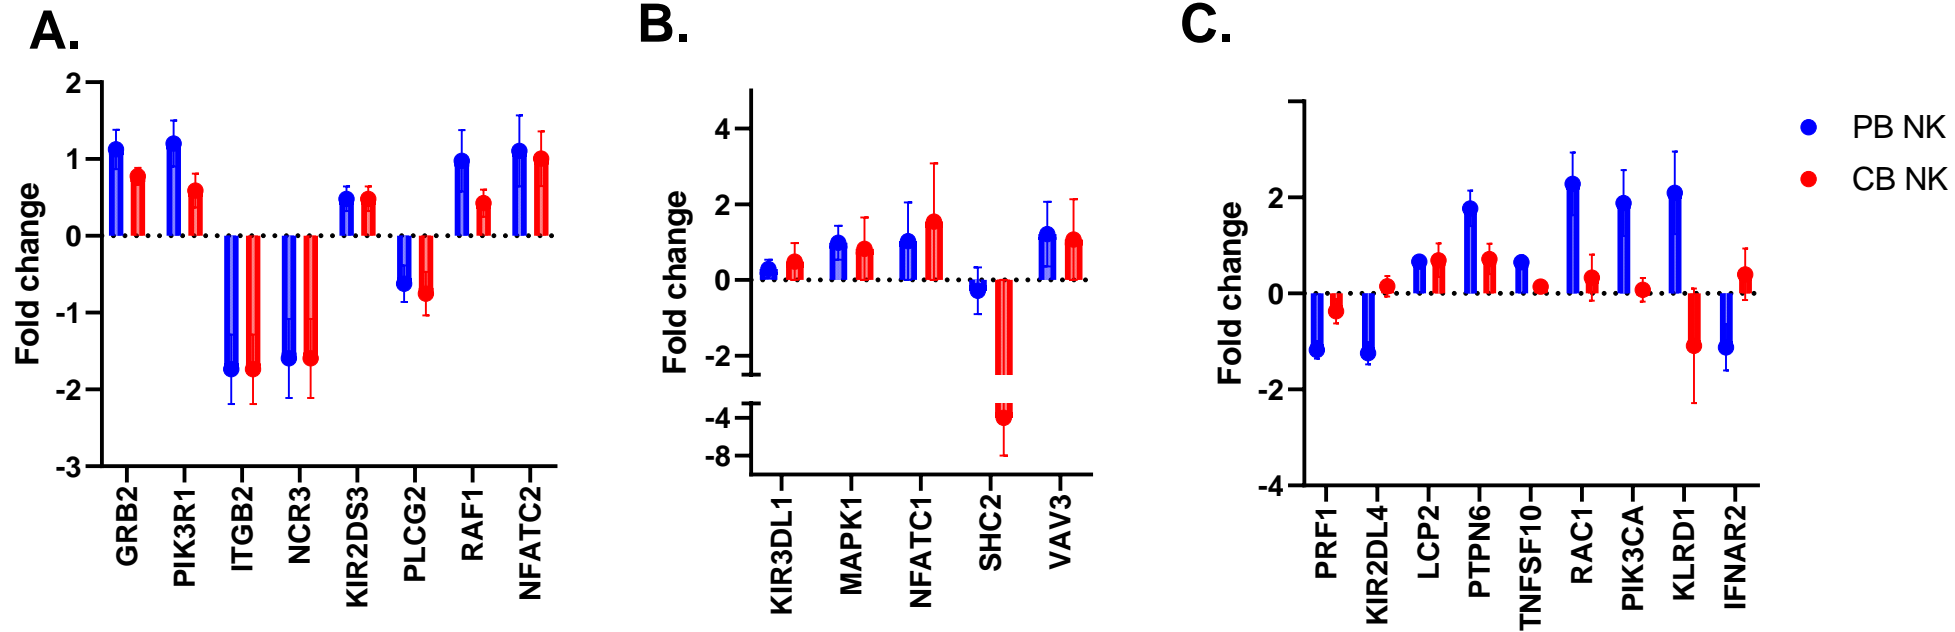

# Supplemental Figure 3

A.

Lymphocyte gate

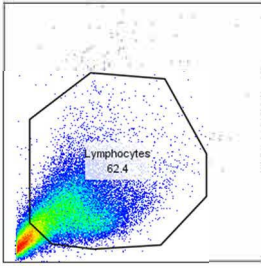

PB8+TGF- $\beta$ \_1.fcs  
Ungated  
50000

Single cell gate

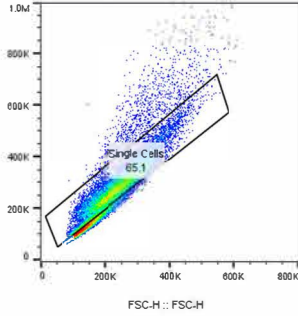

PB8+TGF- $\beta$ \_1.fcs  
Lymphocytes  
31177

Live cell gate

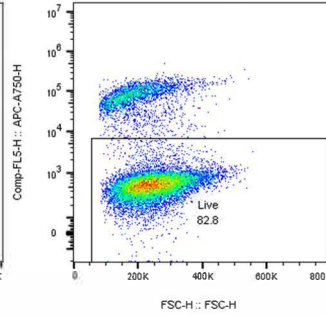

PB8+TGF- $\beta$ \_1.fcs  
Single Cells  
20291

NK cell gate

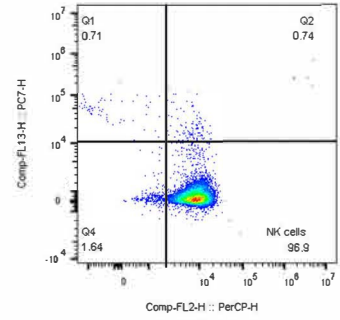

PB8+TGF- $\beta$ \_1.fcs  
Live  
16805

Blank

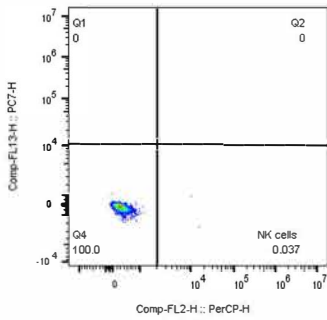

Blank.fcs  
Live  
5478

Sample

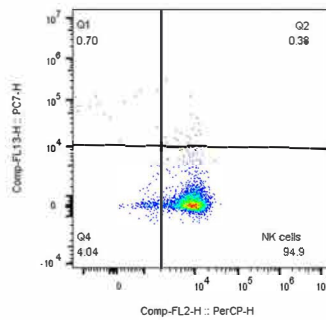

CB18+TGF- $\beta$ \_1.fcs  
Live  
5321

B.

Blank

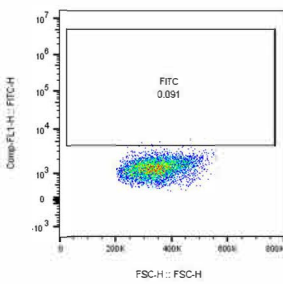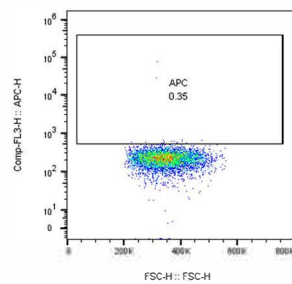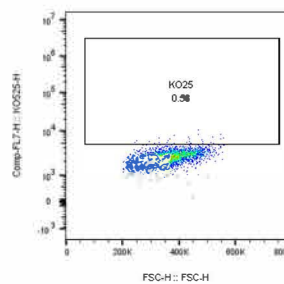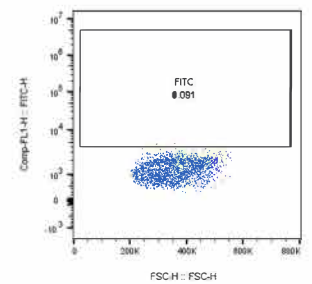

Sample

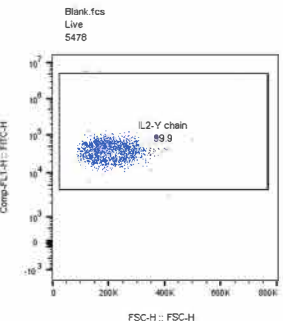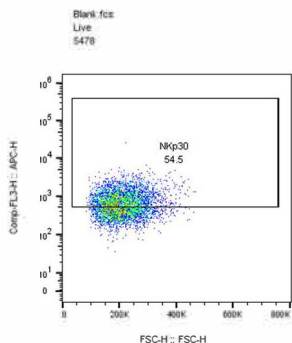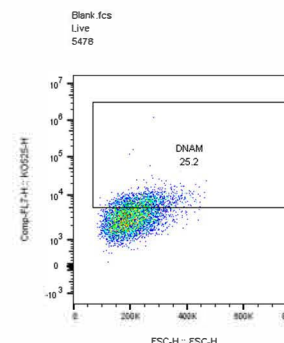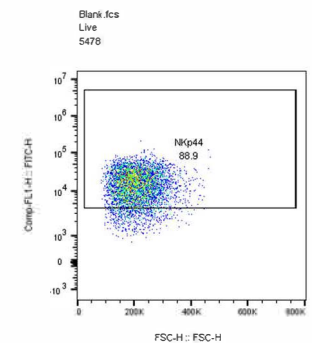

CB18+TGF- $\beta$ \_1.fcs  
NK cells  
3742

CB18+TGF- $\beta$ \_1.fcs  
NK cells  
5370

CB18+TGF- $\beta$ \_1.fcs  
NK cells  
5370

CB18+TGF- $\beta$ \_1.fcs  
NK cells  
5370

# Supplemental Figure 3 C.

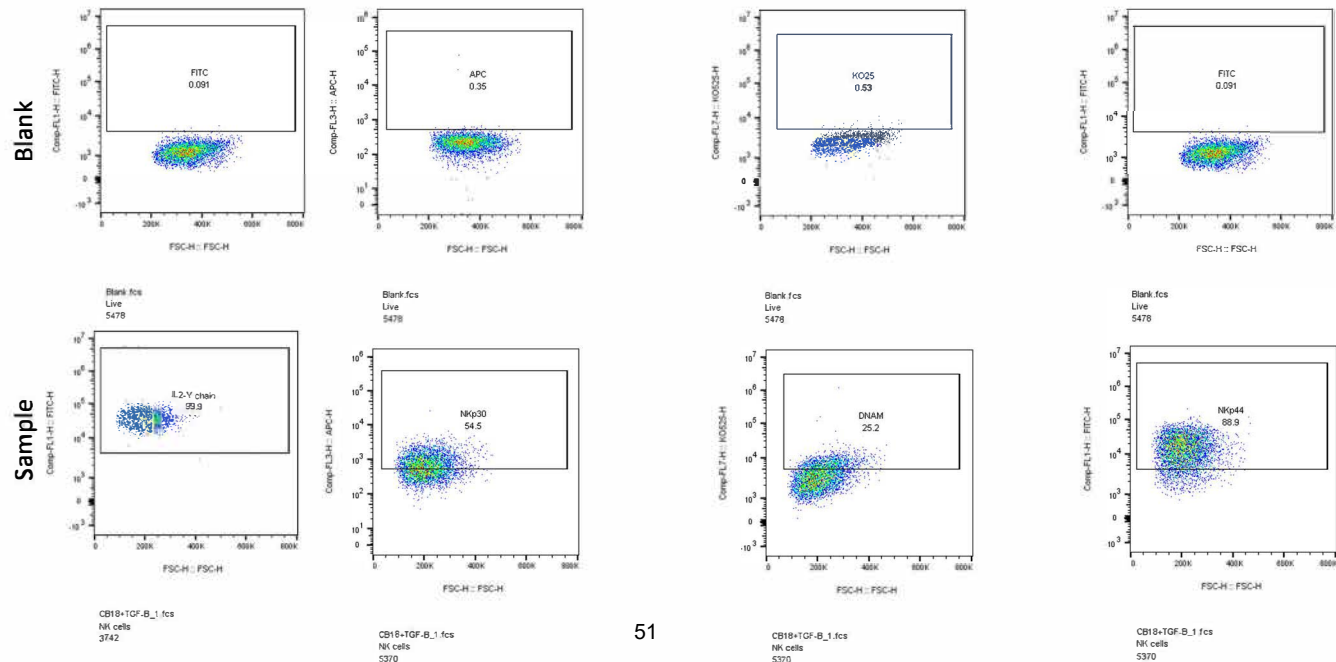

# Supplemental Figure 4

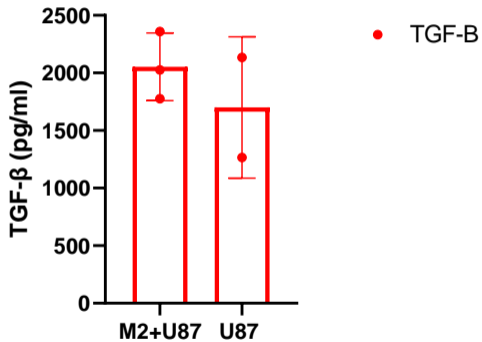

Supplement: NIHMS1826467-supplement-3.pdf [file NIHMS1826467-supplement-3.pdf]
